# Supplementary material for: Substrate and Inhibitor Specificity of the Type II p21-Activated Kinase, PAK6
Source: PubMed Central journal article supplement (PMC3810134; doi:10.1371/journal.pone.0077818), 2013-10-28
Supplement: pone.0077818.s001.pdf [file pone.0077818.s001.pdf]

**Table S1. Quantification of peptide library assay.** Normalized quantified peptide library data. Data are normalized so that the average value with a position is 1.0. The average values from two separate runs are shown. Cells with values greater than 1.6 are shaded green.

|    | Position |      |      |       |      |      |      |      |      |      |
|----|----------|------|------|-------|------|------|------|------|------|------|
|    | -5       | -4   | -3   | -2    | -1   | 0    | +1   | +2   | +3   | +4   |
| P  | 0.93     | 0.77 | 0.33 | 0.47  | 0.14 |      | 0.01 | 0.59 | 0.76 | 1.80 |
| G  | 1.18     | 1.08 | 0.42 | 0.07  | 0.43 |      | 0.12 | 0.51 | 0.93 | 0.75 |
| A  | 0.70     | 0.78 | 0.38 | 0.24  | 0.65 |      | 0.26 | 3.91 | 0.74 | 1.10 |
| C  | 0.66     | 1.01 | 0.46 | 0.17  | 0.83 |      | 1.19 | 2.21 | 1.27 | 0.52 |
| S  | 1.45     | 1.01 | 1.06 | 1.58  | 0.62 | 1.81 | 0.72 | 1.90 | 4.94 | 1.18 |
| T  | 1.07     | 0.75 | 0.35 | 0.50  | 0.39 | 0.19 | 0.73 | 0.68 | 0.52 | 0.68 |
| V  | 0.97     | 0.61 | 0.33 | 0.35  | 0.36 |      | 1.47 | 2.30 | 0.75 | 1.06 |
| I  | 0.69     | 0.69 | 0.28 | 0.22  | 0.42 |      | 2.74 | 1.00 | 0.70 | 0.84 |
| L  | 0.87     | 0.78 | 0.34 | 0.19  | 1.71 |      | 1.55 | 0.50 | 0.84 | 0.67 |
| M  | 1.15     | 0.96 | 0.47 | 0.34  | 1.62 |      | 1.94 | 0.33 | 0.86 | 0.83 |
| F  | 0.68     | 0.89 | 0.51 | 0.51  | 1.41 |      | 1.60 | 0.55 | 0.89 | 1.03 |
| Y  | 0.65     | 1.07 | 0.41 | 1.85  | 1.73 |      | 2.09 | 2.49 | 0.86 | 0.90 |
| W  | 0.79     | 1.46 | 0.71 | 0.27  | 1.94 |      | 3.42 | 0.97 | 1.36 | 1.15 |
| H  | 0.94     | 1.19 | 0.72 | 1.68  | 1.85 |      | 0.70 | 0.48 | 0.74 | 1.18 |
| K  | 1.73     | 1.32 | 5.51 | 0.24  | 1.46 |      | 0.25 | 0.11 | 0.21 | 0.63 |
| R  | 2.37     | 2.17 | 5.43 | 11.05 | 2.28 |      | 0.52 | 0.15 | 0.37 | 0.57 |
| Q  | 0.87     | 0.96 | 1.23 | 0.13  | 0.68 |      | 0.41 | 0.30 | 0.80 | 1.22 |
| N  | 0.84     | 1.23 | 0.62 | 0.08  | 0.94 |      | 0.11 | 0.52 | 0.46 | 1.23 |
| D  | 0.89     | 0.57 | 0.22 | 0.04  | 0.34 |      | 0.12 | 0.40 | 0.92 | 1.62 |
| E  | 0.56     | 0.68 | 0.23 | 0.02  | 0.21 |      | 0.06 | 0.10 | 1.08 | 1.03 |
| pT | 0.83     | 1.01 | 0.11 | 0.00  | 0.03 |      | 0.06 | 0.04 | 0.91 | 2.46 |
| pY | 1.10     | 1.63 | 0.28 | 0.07  | 0.12 |      | 0.56 | 0.77 | 1.16 | 1.61 |
